# Supplementary material for: Improving the Accuracy of Water Storage Anomaly Trends Based on a New Statistical Correction Hydrological Model Weighting Method
Source: MDPI journal article supplement (doi:10.3390/rs13183583), 2021-09-09
Supplement: s1 [file s1]

## SUPPORTING INFORMATION

Table S1. TWSA trends (mm/year) derived from JPL and CSR in HRB's sub-regions (Beijing (BJ), Tianjin (TJ), Hebei (HB), Shanxi (SX), Shandong (SD), and Henan (HN)).

| Region | JPL         | CSR         |
|--------|-------------|-------------|
| HRB    | -17.31±0.85 | -13.67±0.97 |
| BJ     | -8.24±0.44  | -6.18±0.64  |
| TJ     | -14.96±1.07 | -6.13±0.87  |
| HB     | -14.59±0.72 | -12.77±0.95 |
| SX     | -20.22±0.86 | -19.17±1.21 |
| SD     | -28.04±1.95 | -14.01±1.51 |
| HN     | -36.89±1.92 | -31.12±2.85 |

Table S2. Trends of TWSA, SMSA, and GWSA (mm/year) derived from HMs and reference values in BJ.

|           | TWSA        | SMSA       | GWSA        |
|-----------|-------------|------------|-------------|
| NOAH      | 0.58±0.54   | 0.58±0.54  | --          |
| VIC       | -1.17±0.45  | -1.17±0.45 | --          |
| CLSM2.1   | 1.31±0.56   | 0.28±0.15  | 1.03±0.42   |
| CLSM2.0   | 2.64±0.71   | 0.55±0.18  | 2.09±0.53   |
| WGHM      | -33.34±0.91 | 0.14±0.09  | -33.48±0.33 |
| PCR       | -20.12±0.99 | 0.08±0.34  | -20.20±0.19 |
| CLM       | -3.09±0.99  | 4.06±0.84  | -7.15±0.50  |
| Reference | -7.28±0.48  | 1.16±0.54  | -8.44±0.38  |

Table S3. Trends of TWSA, SMSA, and GWSA (mm/year) derived from HMs and reference values in TJ.

|           | TWSA        | SMSA       | GWSA        |
|-----------|-------------|------------|-------------|
| NOAH      | -1.65±0.77  | -1.65±0.77 | --          |
| VIC       | 0.17±0.65   | 0.17±0.65  | --          |
| CLSM2.1   | 0.52±0.73   | -0.02±0.21 | 0.54±0.60   |
| CLSM2.0   | 4.80±0.87   | 0.42±0.24  | 4.38±0.70   |
| WGHM      | -1.96±1.05  | 0.00±0.09  | -1.96±0.31  |
| PCR       | -20.46±0.68 | -0.25±0.53 | -20.21±0.15 |
| CLM       | 4.43±1.63   | 9.91±1.24  | -5.48±0.99  |
| Reference | -10.73±0.88 | 2.81±0.81  | -13.54±0.63 |

Table S4. Trends of TWSA, SMSA, and GWSA (mm/year) derived from HMs and reference values in HB.

|         | TWSA        | SMSA       | GWSA        |
|---------|-------------|------------|-------------|
| NOAH    | -2.33±0.66  | -2.33±0.66 | --          |
| VIC     | -0.96±0.48  | -0.96±0.48 | --          |
| CLSM2.1 | -0.60±0.69  | -0.17±0.18 | -0.43±0.54  |
| CLSM2.0 | 0.15±0.82   | -0.05±0.21 | 0.20±0.64   |
| WGHM    | -22.54±0.42 | -0.02±0.11 | -22.52±0.19 |

|           |             |            |             |
|-----------|-------------|------------|-------------|
| PCR       | -23.77±0.76 | -0.84±0.37 | -22.93±0.14 |
| CLM       | -3.33±0.99  | 2.05±0.80  | -5.38±0.50  |
| Reference | -13.79±0.74 | -0.41±0.60 | -13.38±0.43 |

Table S5. Trends of TWSA, SMSA, and GWSA (mm/year) derived from HMs and reference values in SX.

|           | TWSA        | SMSA       | GWSA        |
|-----------|-------------|------------|-------------|
| NOAH      | -2.60±0.60  | -2.60±0.60 | --          |
| VIC       | -2.10±0.49  | -2.10±0.49 | --          |
| CLSM2.1   | -1.66±0.71  | -0.45±0.19 | -1.21±0.52  |
| CLSM2.0   | -1.32±1.01  | -0.38±0.28 | -0.92±0.73  |
| WGHM      | -3.19±0.34  | 0.07±0.14  | -3.26±0.13  |
| PCR       | -5.46±0.43  | -0.80±0.37 | -4.66±0.07  |
| CLM       | -4.06±0.93  | 3.09±0.84  | -7.15±0.32  |
| Reference | -19.91±0.91 | -0.54±0.61 | -19.38±0.64 |

Table S6. Trends of TWSA, SMSA, and GWSA (mm/year) derived from HMs and reference values in SD.

|           | TWSA        | SMSA       | GWSA        |
|-----------|-------------|------------|-------------|
| NOAH      | -5.23±1.44  | -5.23±1.44 | --          |
| VIC       | -1.59±0.77  | -1.59±0.77 | --          |
| CLSM2.1   | -4.31±1.32  | -1.01±0.30 | -3.30±1.12  |
| CLSM2.0   | -7.75±1.60  | -1.61±0.35 | -6.14±1.35  |
| WGHM      | -0.51±0.82  | -0.08±0.09 | -0.43±0.47  |
| PCR       | -32.71±1.45 | -3.69±0.71 | -29.02±0.43 |
| CLM       | 5.49±1.78   | 3.14±1.51  | 2.35±0.94   |
| Reference | -21.28±1.51 | -1.23±1.13 | -20.05±1.03 |

Table S7. Trends of TWSA, SMSA, and GWSA (mm/year) derived from HMs and reference values in HN.

|           | TWSA        | SMSA       | GWSA        |
|-----------|-------------|------------|-------------|
| NOAH      | -7.67±1.21  | -7.67±1.21 | --          |
| VIC       | -2.44±0.63  | -2.44±0.63 | --          |
| CLSM2.1   | -7.28±1.24  | -1.52±0.29 | -5.76±0.99  |
| CLSM2.0   | -11.48±1.50 | -2.52±0.36 | -8.96±1.16  |
| WGHM      | -14.11±0.61 | -0.11±0.07 | -14.00±0.44 |
| PCR       | -62.34±0.73 | -3.63±0.53 | -58.71±0.20 |
| CLM       | -7.10±1.61  | -1.42±1.43 | -5.68±0.76  |
| Reference | -34.57±2.06 | -3.84±1.02 | -30.73±1.35 |

Table S8. Indices of TWSA, SMSA, and GWSA between reference values and HMs in BJ.

|      | TWSA                     |            |          | SMSA                     |            |          | GWSA                     |            |          |
|------|--------------------------|------------|----------|--------------------------|------------|----------|--------------------------|------------|----------|
|      | <i>RMSE</i><br><i>mm</i> | <i>NSE</i> | <i>r</i> | <i>RMSE</i><br><i>mm</i> | <i>NSE</i> | <i>r</i> | <i>RMSE</i><br><i>mm</i> | <i>NSE</i> | <i>r</i> |
| Noah | 36.10                    | -0.27      | 0.37     | 11.05                    | 0.76       | 0.9      | -                        | -          | -        |

|         |       |       |      |       |      |      |        |       |       |
|---------|-------|-------|------|-------|------|------|--------|-------|-------|
| VIC     | 32.01 | 0.00  | 0.55 | 14.48 | 0.6  | 0.79 | -      | -     | -     |
| CLSM2.1 | 41.46 | -0.68 | 0.23 | 18.64 | 0.33 | 0.8  | 50.41  | -1.31 | -0.37 |
| CLSM2.0 | 50.54 | -1.49 | 0.03 | 18.4  | 0.35 | 0.71 | 56.84  | -1.93 | -0.5  |
| WGHM    | 90.25 | -6.95 | 0.86 | 22.23 | 0.05 | 0.37 | 102.46 | -8.52 | 0.88  |
| PCR     | 46.69 | -1.13 | 0.84 | 19.26 | 0.28 | 0.57 | 47.69  | -1.06 | 0.87  |
| CLM     | 40.34 | -0.59 | 0.57 | 21.59 | 0.1  | 0.89 | 31.58  | 0.1   | 0.62  |

Table S9. Indices of TWSA, SMSA, and GWSA between reference values and HMs in TJ.

|         | TWSA                     |            |          | SMSA                     |            |          | GWSA                     |            |          |
|---------|--------------------------|------------|----------|--------------------------|------------|----------|--------------------------|------------|----------|
|         | <i>RMSE</i><br><i>mm</i> | <i>NSE</i> | <i>r</i> | <i>RMSE</i><br><i>mm</i> | <i>NSE</i> | <i>r</i> | <i>RMSE</i><br><i>mm</i> | <i>NSE</i> | <i>r</i> |
| Noah    | 43.63                    | 0.29       | 0.68     | 23.37                    | 0.55       | 0.82     | -                        | -          | -        |
| VIC     | 52.23                    | -0.01      | 0.48     | 19.08                    | 0.7        | 0.87     | -                        | -          | -        |
| CLSM2.1 | 52.06                    | 0          | 0.48     | 30.31                    | 0.24       | 0.71     | 69.11                    | -0.66      | -0.08    |
| CLSM2.0 | 71.32                    | -0.89      | 0.15     | 29.35                    | 0.28       | 0.69     | 85.83                    | -1.56      | -0.42    |
| WGHM    | 59.15                    | -0.3       | 0.34     | 33.76                    | 0.05       | 0.56     | 57.79                    | -0.16      | 0.31     |
| PCR     | 49.77                    | 0.08       | 0.79     | 28.79                    | 0.31       | 0.61     | 35.41                    | 0.56       | 0.88     |
| CLM     | 92.9                     | -2.2       | 0.18     | 40.01                    | -0.33      | 0.88     | 66.56                    | -0.54      | 0.32     |

Table S10. Indices of TWSA, SMSA, and GWSA between reference values and HMs in HB.

|         | TWSA                     |            |          | SMSA                     |            |          | GWSA                     |            |          |
|---------|--------------------------|------------|----------|--------------------------|------------|----------|--------------------------|------------|----------|
|         | <i>RMSE</i><br><i>mm</i> | <i>NSE</i> | <i>r</i> | <i>RMSE</i><br><i>mm</i> | <i>NSE</i> | <i>r</i> | <i>RMSE</i><br><i>mm</i> | <i>NSE</i> | <i>r</i> |
| Noah    | 51.57                    | 0.17       | 0.68     | 10.83                    | 0.81       | 0.94     | -                        | -          | -        |
| VIC     | 58.76                    | -0.07      | 0.53     | 11.57                    | 0.78       | 0.89     | -                        | -          | -        |
| CLSM2.1 | 61.05                    | -0.16      | 0.46     | 19.49                    | 0.39       | 0.81     | 63.98                    | -0.67      | 0.06     |
| CLSM2.0 | 65.22                    | -0.32      | 0.36     | 18.95                    | 0.42       | 0.78     | 67.51                    | -0.85      | -0.03    |
| WGHM    | 37.63                    | 0.56       | 0.9      | 22.83                    | 0.16       | 0.53     | 38.58                    | 0.39       | 0.94     |
| PCR     | 38.49                    | 0.54       | 0.9      | 19.85                    | 0.36       | 0.61     | 39.33                    | 0.37       | 0.94     |
| CLM     | 56.4                     | 0.01       | 0.61     | 16.94                    | 0.54       | 0.9      | 45.64                    | 0.15       | 0.68     |

Table S11. Indices of TWSA, SMSA, and GWSA between reference values and HMs in SX.

|         | TWSA                     |            |          | SMSA                     |            |          | GWSA                     |            |          |
|---------|--------------------------|------------|----------|--------------------------|------------|----------|--------------------------|------------|----------|
|         | <i>RMSE</i><br><i>mm</i> | <i>NSE</i> | <i>r</i> | <i>RMSE</i><br><i>mm</i> | <i>NSE</i> | <i>r</i> | <i>RMSE</i><br><i>mm</i> | <i>NSE</i> | <i>r</i> |
| Noah    | 77.53                    | 0.03       | 0.65     | 12.06                    | 0.77       | 0.93     | -                        | -          | -        |
| VIC     | 84.43                    | -0.15      | 0.51     | 12.79                    | 0.74       | 0.87     | -                        | -          | -        |
| CLSM2.1 | 85.78                    | -0.19      | 0.43     | 20.54                    | 0.34       | 0.76     | 89.41                    | -0.53      | 0.18     |
| CLSM2.0 | 86.99                    | -0.23      | 0.41     | 18.54                    | 0.46       | 0.78     | 91.17                    | -0.6       | 0.15     |
| WGHM    | 77.68                    | 0.02       | 0.7      | 23.95                    | 0.1        | 0.47     | 75.45                    | -0.09      | 0.86     |
| PCR     | 70.03                    | 0.21       | 0.75     | 22.81                    | 0.19       | 0.5      | 70.3                     | 0.05       | 0.92     |
| CLM     | 75.45                    | 0.08       | 0.65     | 20.06                    | 0.37       | 0.9      | 59.7                     | 0.32       | 0.91     |

Table S12. Indices of TWSA, SMSA, and GWSA between reference values and HMs in SD.

|  | TWSA |  |  | SMSA |  |  | GWSA |  |  |
|--|------|--|--|------|--|--|------|--|--|
|--|------|--|--|------|--|--|------|--|--|

|         | <i>RMSE</i><br><i>mm</i> | <i>NSE</i> | <i>r</i> | <i>RMSE</i><br><i>mm</i> | <i>NSE</i> | <i>r</i> | <i>RMSE</i><br><i>mm</i> | <i>NSE</i> | <i>r</i> |
|---------|--------------------------|------------|----------|--------------------------|------------|----------|--------------------------|------------|----------|
| Noah    | 85.04                    | 0.22       | 0.7      | 28.64                    | 0.62       | 0.92     | -                        | -          | -        |
| VIC     | 104.1                    | -0.16      | 0.41     | 31.51                    | 0.54       | 0.75     | -                        | -          | -        |
| CLSM2.1 | 85.78                    | 0.21       | 0.69     | 36.83                    | 0.38       | 0.85     | 96.36                    | -0.4       | 0.32     |
| CLSM2.0 | 69.1                     | 0.49       | 0.77     | 36.64                    | 0.38       | 0.78     | 83.67                    | -0.06      | 0.48     |
| WGHM    | 108.2                    | -0.26      | 0.29     | 45.19                    | 0.06       | 0.48     | 102.24                   | -0.58      | 0        |
| PCR     | 71.68                    | 0.45       | 0.85     | 32.77                    | 0.51       | 0.77     | 54.25                    | 0.56       | 0.85     |
| CLM     | 129.53                   | -0.8       | 0.25     | 31.46                    | 0.55       | 0.92     | 108.42                   | -0.77      | -0.04    |

Table S13. Indices of TWSA, SMSA, and GWSA between reference values and HMs in HN.

|         | TWSA                     |            |          | SMSA                     |            |          | GWSA                     |            |          |
|---------|--------------------------|------------|----------|--------------------------|------------|----------|--------------------------|------------|----------|
|         | <i>RMSE</i><br><i>mm</i> | <i>NSE</i> | <i>r</i> | <i>RMSE</i><br><i>mm</i> | <i>NSE</i> | <i>r</i> | <i>RMSE</i><br><i>mm</i> | <i>NSE</i> | <i>r</i> |
| Noah    | 129.29                   | 0.23       | 0.81     | 20.51                    | 0.79       | 0.96     | -                        | -          | -        |
| VIC     | 156.68                   | -0.14      | 0.56     | 25.87                    | 0.66       | 0.84     | -                        | -          | -        |
| CLSM2.1 | 134.76                   | 0.16       | 0.76     | 33.11                    | 0.44       | 0.9      | 125.94                   | -0.1       | 0.6      |
| CLSM2.0 | 108.32                   | 0.46       | 0.86     | 29.78                    | 0.55       | 0.9      | 106.79                   | 0.21       | 0.73     |
| WGHM    | 111.54                   | 0.42       | 0.91     | 43.33                    | 0.04       | 0.34     | 89.15                    | 0.45       | 0.92     |
| PCR     | 129.66                   | 0.22       | 0.85     | 29.48                    | 0.56       | 0.79     | 117.25                   | 0.05       | 0.9      |
| CLM     | 126.51                   | 0.26       | 0.73     | 24.11                    | 0.7        | 0.94     | 115.26                   | 0.08       | 0.68     |

Table S14. Trends of TWSA, SMSA, and GWSA (mm/year) derived from HMs in HRB's plains.

|           | TWSA        | SMSA       | GWSA        |
|-----------|-------------|------------|-------------|
| NOAH      | -4.13±0.98  | -4.13±0.98 | -           |
| VIC       | -0.68±0.60  | -0.68±0.60 | -           |
| CLSM2.1   | -2.17±0.92  | -0.54±0.23 | -1.63±0.76  |
| CLSM2.0   | -2.48±1.10  | -0.68±0.26 | -1.80±0.90  |
| WGHM      | -33.59±0.71 | -0.02±0.09 | -33.57±0.37 |
| PCR       | -42.73±0.95 | -1.99±0.55 | -40.74±0.35 |
| CLM       | 2.08±1.37   | 5.63±1.18  | -3.55±0.71  |
| Reference | -17.17±1.05 | 0.27±0.85  | -17.44±0.68 |

Table S15. Trends of TWSA, SMSA, and GWSA (mm/year) derived from HMs in HRB's mountains.

|           | TWSA        | SMSA       | GWSA        |
|-----------|-------------|------------|-------------|
| NOAH      | -1.75±0.54  | -1.75±0.54 | -           |
| VIC       | -1.40±0.45  | -1.40±0.45 | -           |
| CLSM2.1   | -0.78±0.64  | -0.21±0.17 | -0.57±0.49  |
| CLSM2.0   | -0.13±0.79  | -0.07±0.21 | -0.06±0.59  |
| WGHM      | -11.04±0.34 | 0.01±0.14  | -11.05±0.11 |
| PCR       | -11.93±0.59 | -0.66±0.31 | -11.27±0.07 |
| CLM       | -4.95±0.87  | 1.13±0.72  | -6.08±0.36  |
| Reference | -14.19±0.69 | -0.67±0.54 | -13.52±0.42 |

Table S16. Indices of TWSA, SMSA, and GWSA between reference values and HMs in HRB's

plains.

|         | TWSA                     |            |          | SMSA                     |            |          | GWSA                     |            |          |
|---------|--------------------------|------------|----------|--------------------------|------------|----------|--------------------------|------------|----------|
|         | <i>RMSE</i><br><i>mm</i> | <i>NSE</i> | <i>r</i> | <i>RMSE</i><br><i>mm</i> | <i>NSE</i> | <i>r</i> | <i>RMSE</i><br><i>mm</i> | <i>NSE</i> | <i>r</i> |
| Noah    | 62.55                    | 0.28       | 0.73     | 23.23                    | 0.56       | 0.88     |                          |            |          |
| VIC     | 79.94                    | -0.18      | 0.39     | 20.84                    | 0.65       | 0.82     |                          |            |          |
| CLSM2.1 | 70.43                    | 0.08       | 0.62     | 27.97                    | 0.36       | 0.83     | 80.58                    | -0.46      | 0.22     |
| CLSM2.0 | 67.8                     | 0.15       | 0.63     | 27.18                    | 0.4        | 0.82     | 79.73                    | -0.43      | 0.24     |
| WGHM    | 68.95                    | 0.12       | 0.87     | 33.32                    | 0.1        | 0.6      | 67.33                    | -0.02      | 0.91     |
| PCR     | 106.35                   | -1.09      | 0.87     | 25.42                    | 0.47       | 0.73     | 92.41                    | -0.92      | 0.91     |
| CLM     | 95.93                    | -0.7       | 0.3      | 30.43                    | 0.25       | 0.89     | 72.73                    | -0.19      | 0.44     |

Table S17. Indices of TWSA, SMSA, and GWSA between reference values and HMs in HRB's mountains.

|         | TWSA                     |            |          | SMSA                     |            |          | GWSA                     |            |          |
|---------|--------------------------|------------|----------|--------------------------|------------|----------|--------------------------|------------|----------|
|         | <i>RMSE</i><br><i>mm</i> | <i>NSE</i> | <i>r</i> | <i>RMSE</i><br><i>mm</i> | <i>NSE</i> | <i>r</i> | <i>RMSE</i><br><i>mm</i> | <i>NSE</i> | <i>r</i> |
| Noah    | 55.69                    | 0.04       | 0.63     | 7.25                     | 0.89       | 0.96     |                          |            |          |
| VIC     | 59.46                    | -0.1       | 0.54     | 10.05                    | 0.8        | 0.89     |                          |            |          |
| CLSM2.1 | 63.31                    | -0.24      | 0.42     | 17.76                    | 0.37       | 0.76     | 64.77                    | -0.68      | 0.09     |
| CLSM2.0 | 66.68                    | -0.38      | 0.34     | 17.28                    | 0.4        | 0.72     | 67.42                    | -0.82      | 0.03     |
| WGHM    | 28.88                    | 0.74       | 0.92     | 20.23                    | 0.18       | 0.5      | 22.21                    | 0.8        | 0.94     |
| PCR     | 32.72                    | 0.67       | 0.87     | 19.45                    | 0.24       | 0.51     | 22.27                    | 0.8        | 0.94     |
| CLM     | 49.73                    | 0.23       | 0.71     | 13.86                    | 0.61       | 0.91     | 41.3                     | 0.32       | 0.81     |
